# Supplementary material for: Facile synthesis of enzyme–inorganic hybrid nanoflowers and their application as an immobilized trypsin reactor for highly efficient protein digestion
Source: Royal Society of Chemistry journal article supplement (doi:10.1039/c4ra00268g), 2014-01-01
Supplement: c4ra00268g1.pdf [file c4ra00268g1.pdf]

## **Supporting information**

**for**

### **Facile synthesis of enzyme-inorganic hybrid nanoflowers and their application as an immobilized trypsin reactor for highly efficient protein digestion<sup>†</sup>**

**Zian Lin,\* Yun Xiao, Ling Wang, Yuqing Yin, Jiangnan Zheng, Huanghao Yang,\* and Guonan Chen**

Ministry of Education Key Laboratory of Analysis and Detection for Food Safety,  
Fujian Provincial Key Laboratory of Analysis and Detection Technology for Food  
Safety, Department of Chemistry, Fuzhou University, Fuzhou 350116 (China), Fax:  
+86-591-22866135

E-mail: zianlin@fzu.edu.cn (Z.A. Lin); hhyang@fzu.edu.cn (H.H. Yang)

## **2. Experimental**

### **2.1 Reagents and Materials.**

All other chemicals were of analytical grade or better. Copper sulfate pentahydrate ( $\text{CuSO}_4 \cdot 5\text{H}_2\text{O}$ ) was purchased from Sinopharm Chemical Reagent, Co., Ltd (Shanghai, China). Iodoacetamide (IAA), 1,4-dithiothreitol (DTT), and formic acid (FA), acetonitrile (ACN, HPLC grade), bovine serum albumin (BSA), horseradish peroxidase (HRP), immunoglobulin G (IgG), and lysozyme (Lyz) were obtained from Sigma (St. Louis, MO). TPCK-treated trypsin (Try) was purchased from Aladin (Shanghai, China).  $\text{N}_\alpha$ -benzoyl-L-arginine ethyl ester (BAEE,  $\text{Mw}=342.82$ , Purity> 98%) was get from Yuanye Biotechnology Co. Ltd (Shanghai, China). Branford Protein Assay (P0006) was get from Beyotime Institute of Biotechnology. The deionized water used in all experiments was purified with a Milli-Q system from Millipore (Milford, MA). Healthy human serum sample was kindly gifted from Fujian Province Official Hospital (Fuzhou, China).

### **2.2 Preparation of enzyme-inorganic hybrid nanoflowers.**

For the synthesis of enzyme-inorganic hybrid nanoflowers, 20  $\mu\text{L}$  of aqueous  $\text{CuSO}_4$  solution (120 mM) was added to 3 mL of phosphate buffered saline (PBS) (0.1 M, pH 7.4) containing different concentrations of enzyme. Followed by incubation at 25 °C for 3 day, blue precipitates were obtained after centrifugation and then dried under vacuum at room temperature. Other protein-inorganic hybrid nanoflowers were aslo prepared by the same method as mentioned above.

### **2.3 Characterizations.**

Scanning electron micrographs (SEM) of the prepared hybrid nanoflowers were carried out on a XL-30E scanning electron microscope (Philips, Netherlands). Fourier transform infrared (FT-IR) spectra of the nanoflowers were conducted with a FT-IR spectrophotometer (Nicolet 6700, Waltham, MA, USA). The crystal structures of the nanoflowers were determined by X-ray powder diffraction (XRD) (D/Max-2500 diffractometer, Shimadzu, Japan). Surface area and pore size analysis of the nanoflowers were performed by Brunauer-Emmett-Teller (BET) and Barrett-Joyner-Halenda (BJH) methods using physisorption analyzer (Micromeritics ASAP2020 porosimeter, USA). The data of adsorption were obtained by using UV/Vis spectrophotometer (Shimadzu UV2550, Japan). The encapsulation yield of the trypsin was obtained by determining the supernatant at 280 nm using the UV/Vis spectrophotometer and weight percentage of trypsin in the nanoflowers was determined by the gravimetric method. Analysis of digested peptides was performed with LC-ESI-Q-TOF/MS (Agilent, Palo Alto, CA, U.S.A.).

### **2.4 Measurement of the trypsin activity.**

The catalytic activity of the trypsin was determined using BAEE as the substrate. For this purpose, some modifications were made to determine the activity of immobilized trypsin following the method developed by Schwert and Takenaka.<sup>[1]</sup> 0.2 mg immobilized trypsin on the nanoflowers was dissolved in 20  $\mu$ L, 50 mM  $\text{NH}_4\text{HCO}_3$  buffer solution (pH 8.0). The blank solution, which contained 0.2 mg copper

phosphate and 280  $\mu\text{L}$ , 0.5 mM BAEE in 50 mM  $\text{NH}_4\text{HCO}_3$  buffer solution (pH 8.0), was used to calibrate the UV/Vis spectrophotometer at 253 nm; then a total of 280  $\mu\text{L}$ , 0.5 mM BAEE was hydrolyzed with nanoflowers at 25  $^\circ\text{C}$ , and the increase in absorbance at 253 nm was measured every 30 s for 10 min; finally, the kinetics curves with regards to the enzymatic reaction were drawn. The bioactivity was calculated in BAEE-units/mg trypsin, and 1 BAEE-unit is equal to an increase in absorbance of 0.001/min at 253 nm under specified conditions. The activity was calculated with following equations:

$$\text{The activity (BAEE unit/mL)} = (\Delta A_{253 \text{ nm/min}}) / (0.001 \times V(\text{trypsin})) \quad (1)$$

$$\text{The activity (BAEE unit/mg)} = \text{The activity (BAEE unit/mL)} / (\text{concentration of trypsin (mg/mL)} \times V(\text{trypsin})) \quad (2)$$

In the case of free trypsin, the activity measurement was done following the procedures and the conditions similar to those for immobilized trypsin.

#### **2.4 Digestion of proteins and human serum using hybrid nanoflowers.**

1.0 mg protein (BSA or HRP) in 1.0 mL of 50 mM  $\text{NH}_4\text{HCO}_3$  buffer solution (pH 8.0) (or 10  $\mu\text{L}$  human serum in 590  $\mu\text{L}$  of 50 mM  $\text{NH}_4\text{HCO}_3$  buffer solution (pH 8.0), which corresponds to 600  $\mu\text{g}$  total proteins by Bradford protein assay (Bio-Rad, Catalog. No. P0006) using BSA a standard) was denatured in a 95  $^\circ\text{C}$  water bath for 5 min and then reduced in 15% (v/v) ACN and 5 mM DTT for 1h at 56  $^\circ\text{C}$ . When cooled to room temperature, cysteines were alkylated in the dark in 10 mM IAA for 1h at room temperature. Subsequently, 0.10 mg dried nanoflowers was transferred to

300  $\mu$ L of the above denatured protein solution (substrate-to-enzyme ratio of 20:1) in a 1.5 mL Eppendorf tube at 37 °C for 1min. The supernatant was collected and directly analyzed by LC-ESI-Q-TOF/MS (Agilent, Palo Alto, CA, U.S.A.).

## **2.5 Digestion of proteins and human serum using free trypsin.**

For comparison, the digestion of protein and human serum was performed according to the conventional procedures. Briefly, 1.0 mg protein (BSA or HRP) in 1.0 mL of 50 mM  $\text{NH}_4\text{HCO}_3$  buffer solution (pH=8.0) (or 10  $\mu$ L human serum in 590  $\mu$ L of 50 mM  $\text{NH}_4\text{HCO}_3$  buffer solution (pH 8.0) was denatured in a 95 °C water bath for 5 min and then reduced in 15% (v/v) ACN and 5 mM DTT for 1h at 56 °C. When cooled to room temperature, cysteines were alkylated in the dark in 10 mM IAA for 1h at room temperature. In solution, digestion was performed by adding trypsin into the pretreated protein sample with a substrate-to-enzyme ratio of 40:1(m/m). Then the solution was incubated at 37°C for 12h. After the digestion, 1% (v/v) formic acid was added to stop the reaction.

## **2.6 MS analysis and database searching.**

The tryptic peptides were separated by reversed-phase HPLC using an Agilent 1260 HPLC. An Agilent C18 column (50 mm  $\times$  3 mm i.d.) packed with a 2.7  $\mu$ m diameter particles, 120 Å pore size C18 resin was used for the separations. The solvents were as follow: (A) 0.1 % formic acid (FA) in water, and (B) 0.1 % FA in acetonitrile. The column was equilibrated at 3 % solvent B. Three minute after sample injection the concentration of buffer B was increased from 3 to 40 % B within 20 min followed by

a linear gradient of 40 % to 80% B over 3 min. A flush step was performed with 80 % B for 3 min and the column was equilibrated with 3 % B for 4 min. The column temperature was maintained at 40 °C.

MS detection was performed on an Agilent 6520 Q-TOF mass spectrometer with a dual ESI source and an Agilent G1607A coaxial sprayer (all from Agilent). All analyses were performed in a positive ion mode. Nitrogen was used as drying gas at a temperature of 350 °C and a flow-rate of 10 L min<sup>-1</sup>. The voltage set for the MS capillary was 4 kV and the fragmentor was set to 175 V. Scanning mass range was from m/z 100 to 3000 at an acquisition rate of 3 spectra s<sup>-1</sup> in the auto MS/MS mode. For MS<sup>2</sup> experiments, the collision energy was set to according to formula, in which the top three highest intensity peaks in each MS were chosen for collision-induced dissociation. Isolation width for MS<sup>2</sup> was  $\pm 4$  amu.

All the LC-MS/MS raw data were searched with Spectrum Mill version A.03.03 against a database (target database of IPI bovine v3.80, IPI plants v3.80, and IPI human.v3.80). Trypsin restriction was set with two missed cleavages. Cyscarboxymethylation was set as the static modification; oxidized methionine and proglutamic acid were set as the variable modifications. The mass tolerances were 100 ppm for parent ions and 200 amu for fragment ions.

## **2.7 Stability and reusability.**

The stability of the immobilized trypsin was assessed after storing at -20°C for 20 days. In order to avoid the loss of nanoflowers during washing process, a home-made digestion device was designed for cycle experiment. In brief, 0.1 mg nanoflowers was

packed into a pipette tip that was beforehand filled with a sieve, and then 300  $\mu\text{L}$  of the above denatured protein solution was pipetted into the tip. After incubating at 37°C for 1min, the solution was pushed and collected for MS analysis. Then the tip was washed two times with 10  $\mu\text{L}$  of 50 mM  $\text{NH}_4\text{HCO}_3$  buffer solution (pH 8.0), and then resuspended in the same buffer to start a new run. The bioactivity to biomacromolecule were expressed in the way that the percentage of residual activity to the initial one.

## **References**

- 1 G.W. Schwert and Y. A. Takenaka, *Biochim. Biophys. Acta.* 1955, **16**, 570-575.

## Supporting Figures and Tables

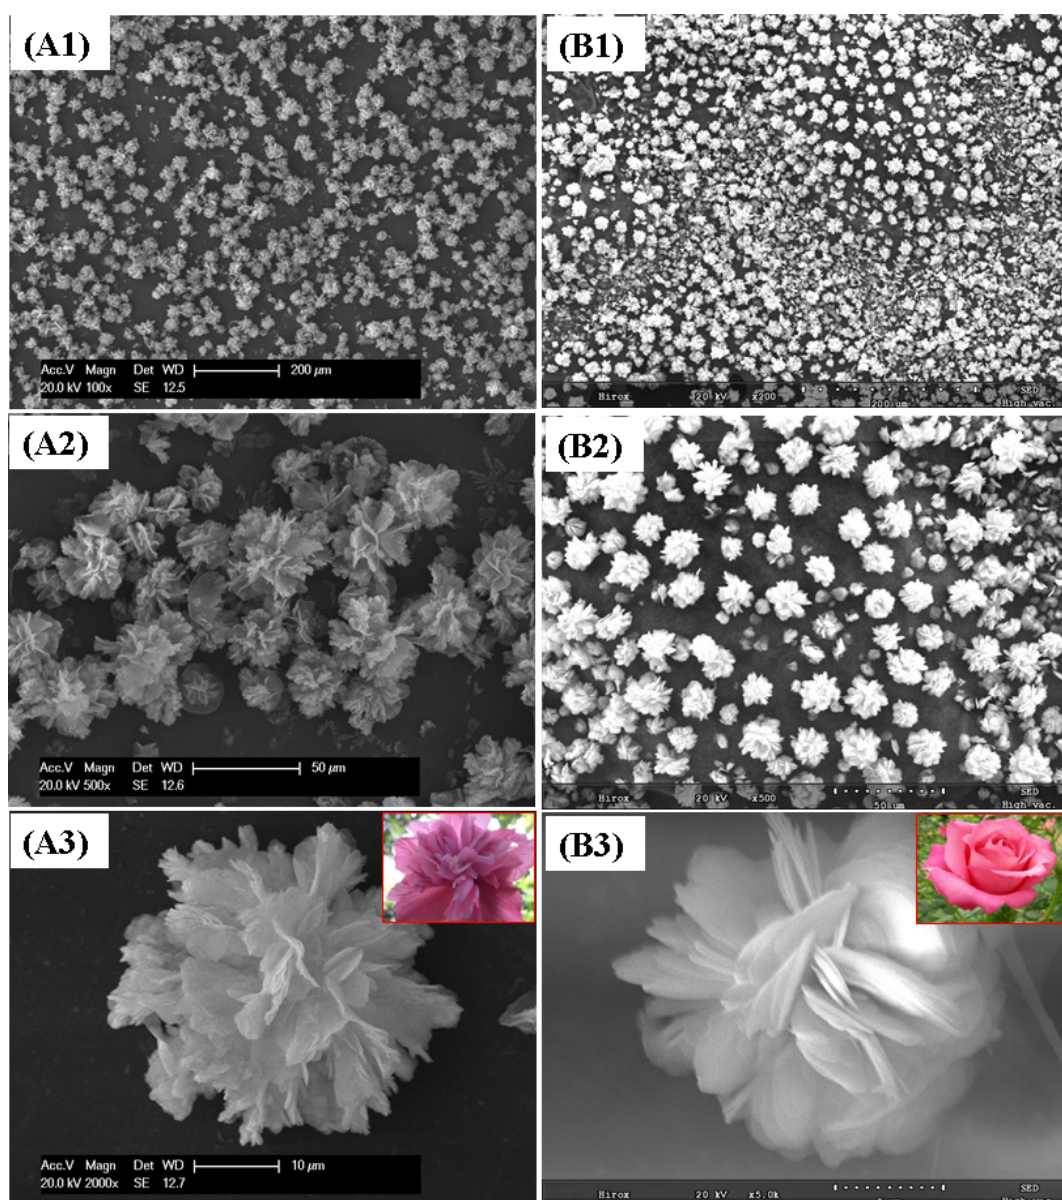

**Figure S1.** The morphologies of protein-inorganic hybrid nanoflowers. (A1-3)  $2.0 \text{ mg} \cdot \text{mL}^{-1}$  Lyz; (B1-3)  $0.1 \text{ mg} \cdot \text{mL}^{-1}$  IgG. Other conditions:  $120 \text{ mM Cu}^{2+}$ ,  $0.1 \text{ M PBS}$  at  $\text{pH } 7.4$ , and reaction for 3 days at  $25 \text{ }^{\circ}\text{C}$ .



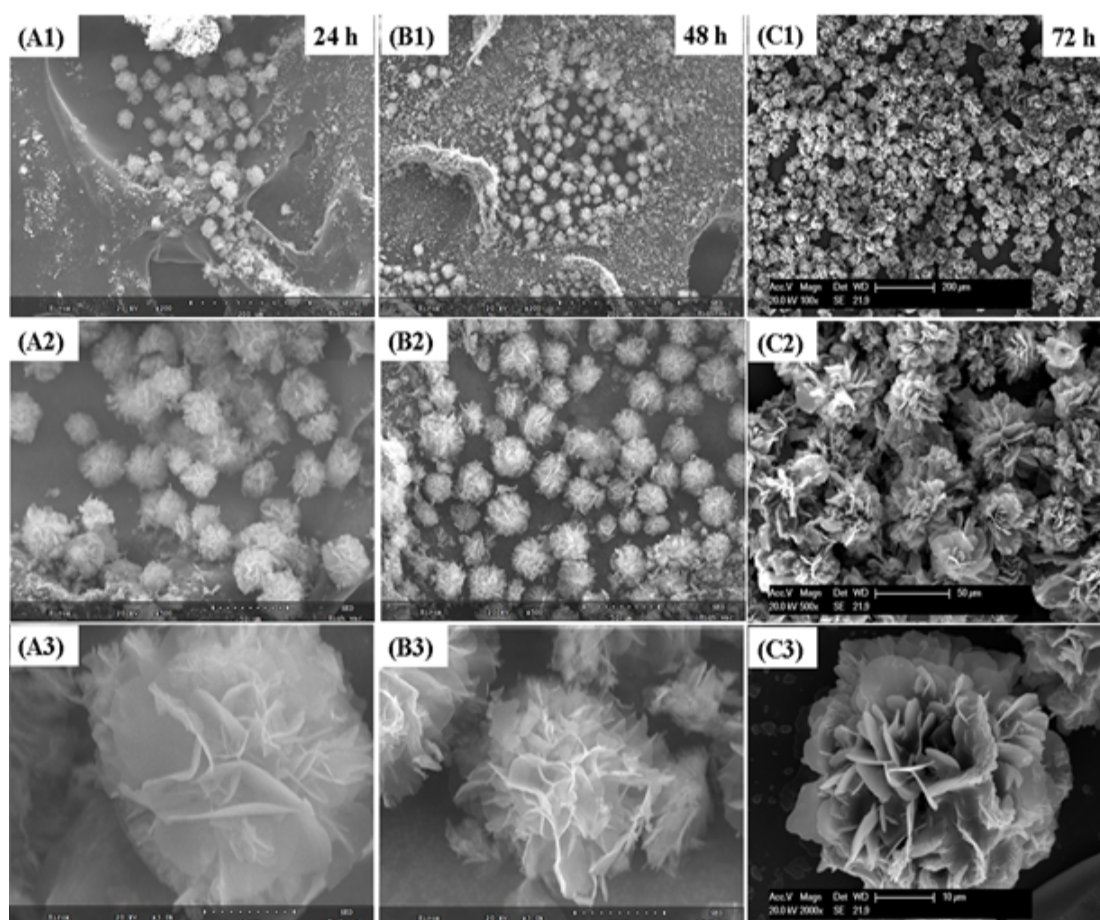

**Figure S2** Effect of different incubation time on the morphologies of nanoflowers. (A1-3) 24 h; (B1-3) 48 h; (C1-3) 72 h. Other conditions: 0.5 mg mL<sup>-1</sup> trypsin, 120 mM Cu<sup>2+</sup>, 0.1 M PBS at pH 7.4, and reaction at 25 °C.

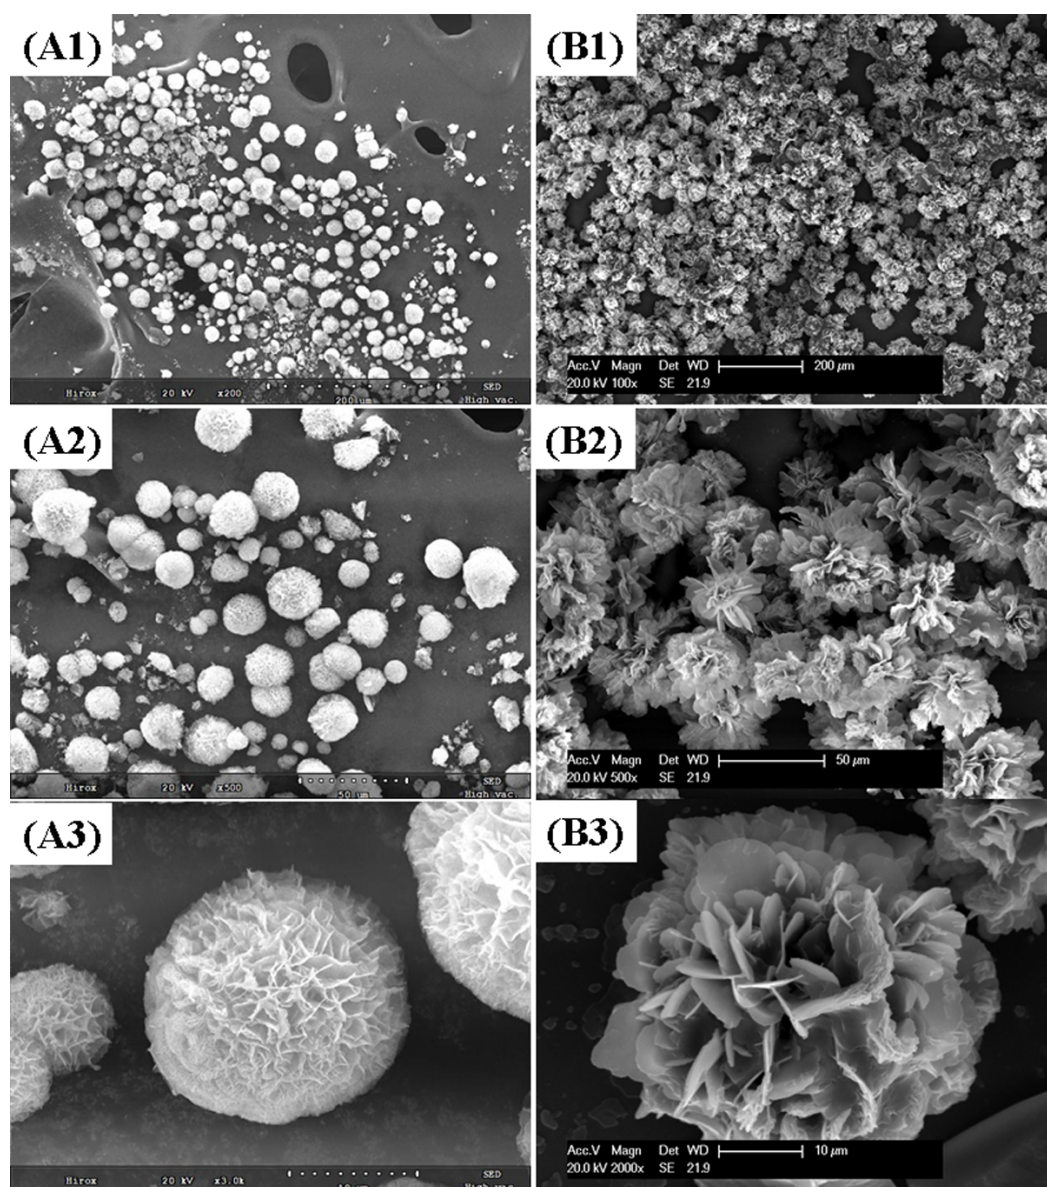

**Figure S3. The effect of different incubation temperature on the morphology of the trypsin-inorganic hybrid nanoflowers.** (A1-3) 0 °C; (B1-3) 25°C. Other conditions: 0.5 mg • mL<sup>-1</sup> trypsin, 120 mM Cu<sup>2+</sup>, 0.1 M PBS at pH 7.4, and reaction for 3 days.

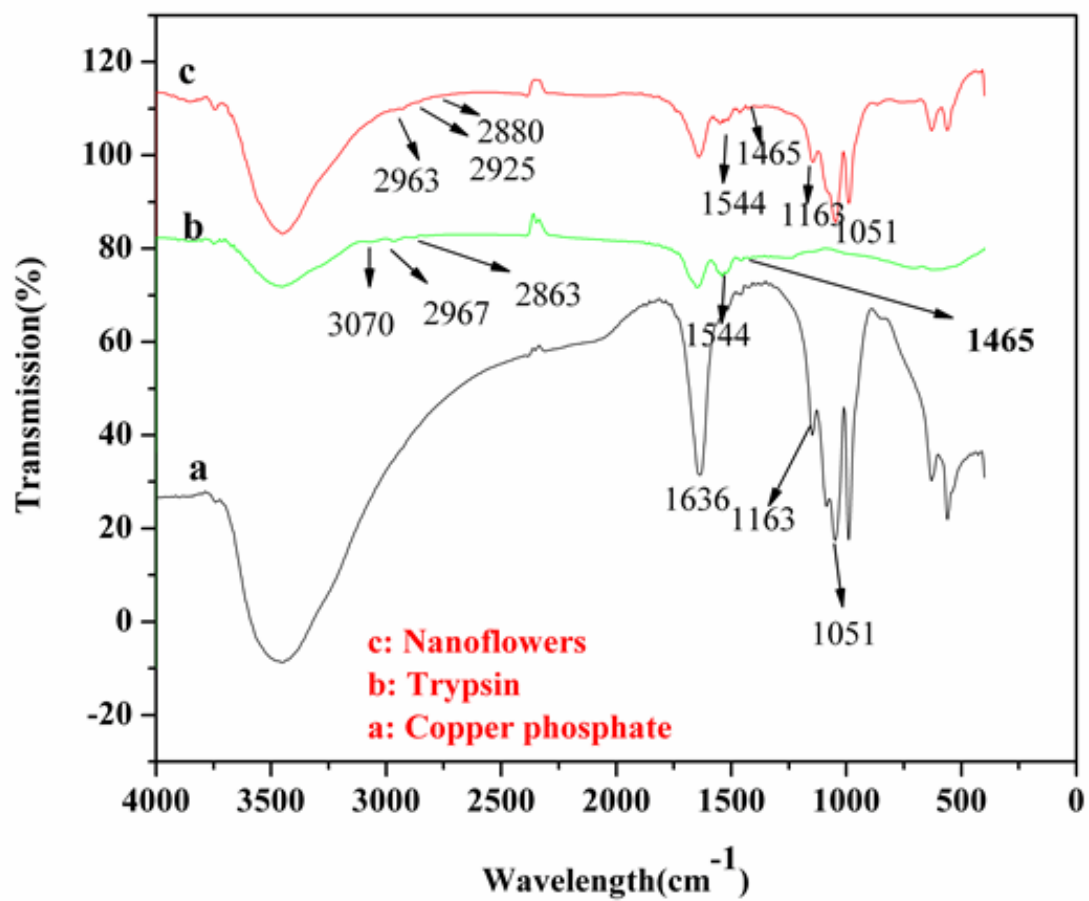

**Figure S4** FT-IR spectra of (a)  $\text{Cu}_3(\text{PO}_4)_2 \cdot 3\text{H}_2\text{O}$ ; (b) trypsin; (c) the trypsin-inorganic hybrid nanoflowers.

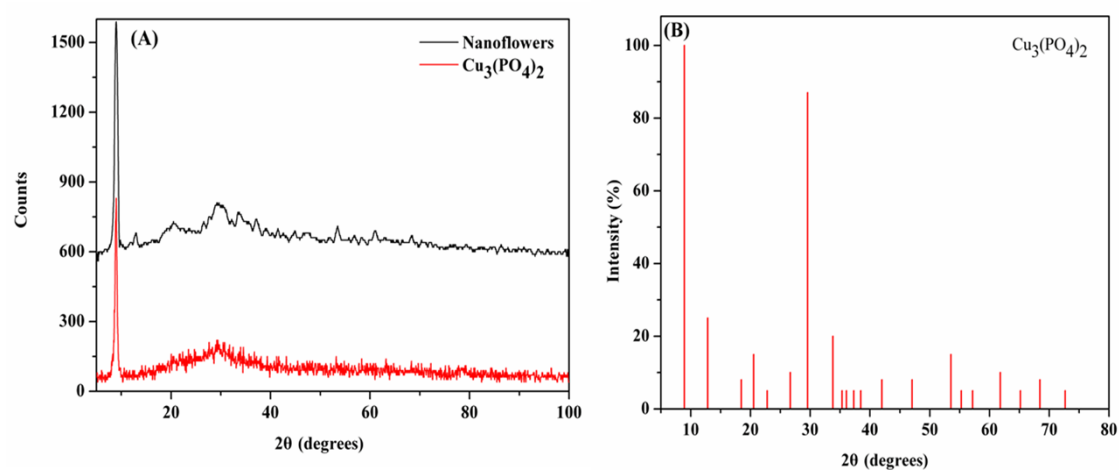

**Figure S5.** XRD patterns of (A) hybrid nanoflowers and  $\text{Cu}_3(\text{PO}_4)_2$ ; (B) peak of  $\text{Cu}_3(\text{PO}_4)_2 \cdot 3\text{H}_2\text{O}$  (JPSCD 00-022-0548).

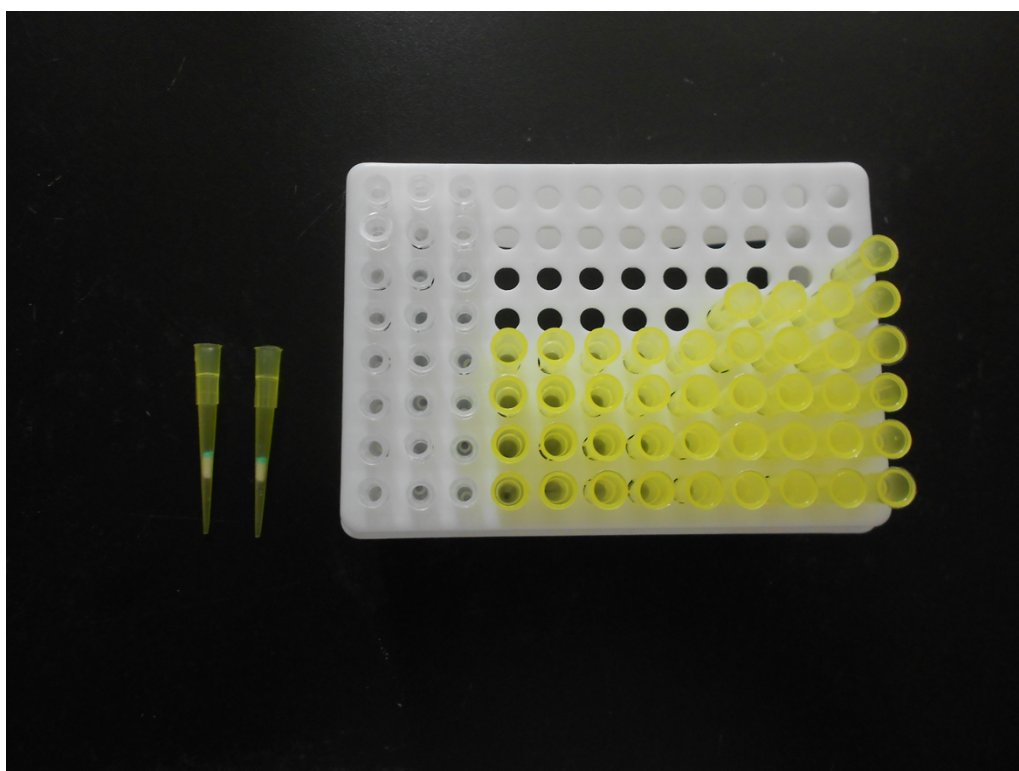

**Figure S6.** Photograph of a home-made IMER devices

**Table S1.** The actual encapsulation yield trypsin in the nanoflowers was further determined by UV/Vis methods<sup>a)</sup>.

| theoretical concentration (mg mL <sup>-1</sup> )                                                        | Actual concentration (mg mL <sup>-1</sup> ) | Absorbance (253 nm) | The supernatant concentration (mg mL <sup>-1</sup> ) | The supernatant absorbance (253 nm) | Encapsulation yield (%) |
|---------------------------------------------------------------------------------------------------------|---------------------------------------------|---------------------|------------------------------------------------------|-------------------------------------|-------------------------|
| 0.02                                                                                                    | 0.0227                                      | 0.05                | 0.0037                                               | 0.027                               | 83.7%                   |
| 0.1                                                                                                     | 0.1126                                      | 0.159               | 0.0235                                               | 0.051                               | 79.1%                   |
| 0.5                                                                                                     | 0.5103                                      | 0.641               | 0.4467                                               | 0.564                               | 12.5%                   |
| (a) Regression equations: $Y = 1.21209 X + 0.02252$ (r=0.999) (X: trypsin concentration, Y: absorbance) |                                             |                     |                                                      |                                     |                         |

**Table S2.** Weight percentage of trypsin in the nanoflower were determined by gravimetric methods

| theoretical<br>concentration<br>(mg mL <sup>-1</sup> ) | Cu <sub>3</sub> (PO <sub>4</sub> ) <sub>2</sub> ·3H <sub>2</sub> O<br>(mg) | Trypsin-<br>incorporated<br>nanoflowers (mg) | Weight<br>percentage (%) |
|--------------------------------------------------------|----------------------------------------------------------------------------|----------------------------------------------|--------------------------|
| 0                                                      | 3.13                                                                       | 0                                            | 0                        |
| 0.02                                                   | 3.38                                                                       | 0.25                                         | 7.4                      |
| 0.1                                                    | 3.44                                                                       | 0.31                                         | 9.0                      |
| 0.5                                                    | 3.58                                                                       | 0.45                                         | 12.6                     |

**Table S3.** Comparison of the proteolytic efficiency of trypsin-immobilized nanoflower and free trypsin for BSA digestion (for 12h incubation, BSA: SwissProt Accession: P02769)

|    | Position             | Mass     | Peptide sequence                      | Free | Nanoflower <sup>[a]</sup> | Nanoflower <sup>[b]</sup> |
|----|----------------------|----------|---------------------------------------|------|---------------------------|---------------------------|
|    | Incubation time      |          |                                       | 12h  | 1min                      | 1min                      |
|    | Matched peptides     |          |                                       | 72   | 70                        | 68                        |
|    | Sequence coverage, % |          |                                       | 92   | 86                        | 80                        |
| 1  | 1-10                 | 1193.602 | (-)DTHKSEIAHR(F)                      | √    | *                         | *                         |
| 2  | 5-10                 | 712.374  | (K)SEIAHR(F)                          | √    | √                         | *                         |
| 3  | 11-20                | 1249.621 | (R)FKDLGEEHFK(G)                      | √    | √                         | *                         |
| 4  | 11-41                | 3723.852 | (R)FKDLGEEHFKGLVLIAFSQYLQQCPFDEHVK(L) | *    | *                         | √                         |
| 5  | 13-20                | 974.458  | (K)DLGEEHFK(G)                        | √    | √                         | *                         |
| 6  | 21-41                | 2493.248 | (K)GLVLIAFSQYLQQCPFDEHVK(L)           | √    | √                         | *                         |
| 7  | 42-51                | 1163.631 | (K)LVNELTEFAK(T)                      | √    | √                         | *                         |
| 8  | 42-64                | 2610.17  | (K)LVNELTEFAKTCVADESHAGCEK(S)         | *    | *                         | √                         |
| 9  | 52-64                | 1465.557 | (K)TCVADESHAGCEK(S)                   | √    | √                         | *                         |
| 10 | 65-75                | 1420.678 | (K)SLHTLFGDELCK(V)                    | *    | √                         | *                         |
| 11 | 76-81                | 545.341  | (K)VASLR(E)                           | *    | √                         | *                         |
| 12 | 82-93                | 1480.491 | (R)ETYGDMADCCEK(Q)                    | √    | √                         | *                         |
| 13 | 82-98                | 2119.789 | (R)ETYGDMADCCEKQEPER(N)               | √    | √                         | *                         |
| 14 | 94-114               | 2542.151 | (K)QEPERNECFLSHKDDSPDLPK(L)           | *    | *                         | √                         |
| 15 | 99-106               | 1035.456 | (R)NECFLSHK(D)                        | √    | √                         | *                         |
| 16 | 99-114               | 1902.854 | (R)NECFLSHKDDSPDLPK(L)                | √    | √                         | *                         |
| 17 | 107-114              | 886.415  | (K)DDSPDLPK(L)                        | √    | √                         | *                         |
| 18 | 115-127              | 1577.752 | (K)LKPDNTLCDEFK(A)                    | √    | *                         | *                         |
| 19 | 115-131              | 2020.953 | (K)LKPDNTLCDEFKADEK(K)                | √    | √                         | *                         |
| 20 | 115-132              | 2149.048 | (K)LKPDNTLCDEFKADEKK(F)               | √    | √                         | *                         |
| 21 | 132-136              | 665.377  | (K)KFWGK(Y)                           | √    | √                         | *                         |
| 22 | 132-144              | 1573.853 | (K)KFWGKYLEIAR(R)                     | *    | *                         | √                         |
| 23 | 133-136              | 537.282  | (K)FWGK(Y)                            | √    | √                         | *                         |
| 24 | 133-144              | 1445.758 | (K)FWGKYLEIAR(R)                      | *    | *                         | √                         |
| 25 | 137-143              | 927.493  | (K)YLEIAR(R)                          | √    | √                         | *                         |
| 26 | 137-144              | 1083.595 | (K)YLEIARR(H)                         | *    | *                         | √                         |
| 27 | 144-159              | 2045.028 | (R)RHPYFYAPELLYYANK(Y)                | *    | √                         | *                         |
| 28 | 145-159              | 1888.927 | (R)HPYFYAPELLYYANK(Y)                 | √    | √                         | *                         |
| 29 | 160-170              | 2490.062 | (K)YNGVFQECQAEDKGACLLPK(I)            | *    | √                         | *                         |
| 30 | 160-173              | 1749.673 | (K)YNGVFQECQAEDK(G)                   | √    | *                         | *                         |
| 31 | 174-180              | 759.407  | (K)GACLLPK(I)                         | √    | √                         | *                         |
| 32 | 174-185              | 1389.723 | (K)GACLLPKIETMR(E)                    | *    | *                         | √                         |
| 33 | 181-185              | 649.334  | (K)IETMR(E)                           | √    | √                         | *                         |
| 34 | 197-204              | 976.524  | (R)LRCASIQK(F)                        | √    | √                         | *                         |



|    |         |          |                                         |   |   |   |
|----|---------|----------|-----------------------------------------|---|---|---|
| 35 | 197-208 | 1465.758 | (R)LRCASIQKFGER(A)                      | * | * | √ |
| 36 | 199-204 | 707.339  | (R)CASIQK(F)                            | √ | √ | * |
| 37 | 199-208 | 1196.57  | (R)CASIQKFGER(A)                        | * | * | √ |
|    | 3       |          |                                         |   |   |   |
| 38 | 205-208 | 508.251  | (K)FGER(A)                              | √ | √ | * |
| 39 | 209-217 | 1001.589 | (R)ALKAWSVAR(L)                         | * | √ | * |
| 40 | 212-217 | 689.373  | (K)AWSVAR(L)                            | * | √ | * |
| 41 | 218-224 | 847.504  | (R)LSQKFPK(A)                           | √ | * | * |
| 42 | 218-232 | 1750.974 | (R)LSQKFPKAEFVEVTK(L)                   | * | * | √ |
| 43 | 225-232 | 922.488  | (K)AEFVEVTK(L)                          | √ | √ | * |
| 44 | 225-239 | 1692.942 | (K)AEFVEVTKLVTDLT(K)(V)                 | √ | √ | * |
| 45 | 233-239 | 789.472  | (K)LVTDLT(K)(V)                         | √ | √ | * |
| 46 | 239-261 | 2615.117 | (K)VHKECCHGDLLECADDRADLAK(Y)            | √ | √ | * |
| 47 | 243-256 | 1752.615 | (K)ECCHGDLLECADDR(A)                    | √ | √ | * |
| 48 | 243-261 | 2250.895 | (K)ECCHGDLLECADDRADLAK(Y)               | √ | √ | * |
| 49 | 257-261 | 517.298  | (R)ADLAK(Y)                             | * | √ | * |
| 50 | 262-273 | 1444.626 | (K)YICDNQDTISSK(L)                      | √ | * | * |
| 51 | 262-275 | 1685.805 | (K)YICDNQDTISSKL(E)                     | * | * | √ |
| 52 | 262-285 | 2960.357 | (K)YICDNQDTISSKLKECCDKP(L)LEK(S)        | * | * | √ |
| 53 | 274-285 | 1534.749 | (K)LKECCDKP(L)LEK(S)                    | √ | * | * |
| 54 | 276-285 | 1293.57  | (K)ECCDKP(L)LEK(S)                      | * | √ | * |
| 55 | 286-294 | 1073.493 | (K)SHCIAEVEK(D)                         | √ | * | * |
| 56 | 286-312 | 3010.435 | (K)SHCIAEVEKDAIPENLPPLTADFAEDK(D)       | * | √ | * |
| 57 | 286-316 | 3513.64  | (K)SHCIAEVEKDAIPENLPPLTADFAEDKDVCK(N)   | * | √ | * |
| 58 | 295-312 | 1955.96  | (K)DAIPENLPPLTADFAEDK(D)                | * | √ | * |
| 59 | 295-316 | 2459.165 | (K)DAIPENLPPLTADFAEDKDVCK(N)            | * | √ | * |
| 60 | 295-323 | 3192.504 | (K)DAIPENLPPLTADFAEDKDVCKNYQEAK(D)      | √ | √ | √ |
| 61 | 317-322 | 752.357  | (K)NYQEAK(D)                            | √ | √ | √ |
| 62 | 317-335 | 2301.082 | (K)NYQEAKDAFLGSFLYEYSR(R)               | √ | √ | √ |
| 63 | 323-335 | 1567.743 | (K)DAFLGSFLYEYSR(R)                     | √ | √ | √ |
| 64 | 323-336 | 1723.844 | (K)DAFLGSFLYEYSRR(H)                    | √ | √ | √ |
| 65 | 336-347 | 1439.812 | (R)RHPEYAVSVLLR(L)                      | √ | √ | √ |
| 66 | 337-347 | 1283.711 | (R)HPEYAVSVLLR(L)                       | √ | √ | √ |
| 67 | 351-375 | 3041.201 | (K)EYEATLEECCA(K)DDPHACYSTVFDK(L)       | √ | √ | √ |
| 68 | 351-362 | 1504.582 | (K)EYEATLEECCA(K)(D)                    | * | * | √ |
| 69 | 351-377 | 3282.38  | (K)EYEATLEECCA(K)DDPHACYSTVFDK(L)(H)    | √ | √ | √ |
| 70 | 363-375 | 1555.637 | (K)DDPHACYSTVFDK(L)                     | * | √ | √ |
| 71 | 363-377 | 1796.816 | (K)DDPHACYSTVFDK(L)(H)                  | √ | * | √ |
| 72 | 376-388 | 1546.895 | (K)LKHLVDEPQNLIK(Q)                     | √ | * | √ |
| 73 | 378-388 | 1305.716 | (K)HLVDEPQNLIK(Q)                       | √ | √ | √ |
| 74 | 378-396 | 2356.124 | (K)HLVDEPQNLIKQNC(Q)DFEK(L)             | * | * | √ |
| 75 | 378-409 | 3816.901 | (K)HLVDEPQNLIKQNC(Q)FEKLGEYGFQNALIVR(Y) | * | * | √ |
|    |         |          | )                                       |   |   |   |
| 76 | 388-412 | 2950.415 | (K)QNC(Q)FEKLGEYGFQNALIVRYTR(K)         | * | * | √ |

|    |         |          |                             |   |   |   |
|----|---------|----------|-----------------------------|---|---|---|
| 77 | 389-396 | 1069.426 | (K)QNCDQFEK(L)              | √ | √ | √ |
| 78 | 389-409 | 2530.203 | (K)QNCDQFEKLGEYGFQNALIVR(Y) | √ | √ | √ |
| 79 | 397-409 | 1479.795 | (K)LGEYGFQNALIVR(Y)         | √ | √ | √ |
| 80 | 397-412 | 1900.008 | (K)LGEYGFQNALIVRYTR(K)      | * | * | √ |
| 81 | 410-427 | 2060.15  | (R)YTRKVPQVSTPTLVEVSR(S)    | * | * | √ |
| 82 | 413-427 | 1639.938 | (R)KVPQVSTPTLVEVSR(S)       | √ | √ | √ |
| 83 | 414-427 | 1511.843 | (K)VPQVSTPTLVEVSR(S)        | √ | √ | √ |
| 84 | 428-431 | 404.25   | (R)SLGK(V)                  | √ | * | √ |
| 85 | 428-435 | 817.489  | (R)SLGKVGTR(C)              | * | * | √ |

---

[a] 1 min of shake-assisted digestion at 37 °C

[b] nanoflowers were stored at -20 °C for 20 days

**Table S4.** Comparison of the proteolytic efficiency of trypsin-immobilized nanoflower and free trypsin for HRP digestion (for 12h incubation, HRP: SwissProt Accession: P00433)

|    | Position             | Mass     | Peptide sequence                          | Free | Nanoflower <sup>[a]</sup> | Nanoflower <sup>[b]</sup> |
|----|----------------------|----------|-------------------------------------------|------|---------------------------|---------------------------|
|    | Incubation time      |          |                                           | 12h  | 1min                      | 1min                      |
|    | Matched peptides     |          |                                           | 14   | 19                        | 16                        |
|    | Sequence coverage, % |          |                                           | 45   | 41                        | 41                        |
| 1  | 50-57                | 959.516  | (R)DTIVNELR(S)                            | √    | *                         | √                         |
| 2  | 62-68                | 743.477  | (R)IAASILR(L)                             | √    | *                         | *                         |
| 3  | 58-68                | 1198.69  | (R)SDPRIAASILR(L)                         | *    | *                         | √                         |
| 4  | 93-105               | 1380.65  | (R)TEKDAFGNANSAR(G)                       | √    | √                         | √                         |
| 5  | 93-112               | 2165.073 | (R)TEKDAFGNANSARGFPVIDR(M)                | *    | √                         | *                         |
| 6  | 96-105               | 1022.465 | (K)DAFGNANSAR(G)                          | √    | *                         | *                         |
| 7  | 106-114              | 1062.576 | (R)GFPVIDRMK(A)                           | *    | √                         | √                         |
| 8  | 106-123              | 2004.999 | (R)GFPVIDRMKAAVESACPR(T)                  | *    | √                         | √                         |
| 9  | 113-123              | 1220.576 | (R)MKAAVESACPR(T)                         | *    | √                         | √                         |
| 10 | 115-123              | 961.441  | (K)AAVESACPR(T)                           | √    | √                         | √                         |
| 11 | 124-148              | 2603.313 | (R)TVSCADLLTIAAQSVTLAGGPSWR(V)            | *    | √                         | *                         |
| 12 | 124-153              | 3125.641 | (R)TVSCADLLTIAAQSVTLAGGPSWRVPLGR(R)       | √    | √                         | √                         |
| 13 | 124-154              | 3281.742 | (R)TVSCADLLTIAAQSVTLAGGPSWRVPLGRR(D)<br>) | *    | √                         | √                         |
| 14 | 154-179              | 2900.567 | (R)RDSLQAFLDLANANLPAPFFTLPLQK(D)          | *    | √                         | *                         |
| 15 | 154-183              | 3405.795 | (R)RDSLQAFLDLANANLPAPFFTLPLQKDSFR(N)      | *    | √                         | √                         |
| 16 | 155-179              | 2744.466 | (R)DSLQAFLDLANANLPAPFFTLPLQK(D)           | √    | √                         | √                         |
| 17 | 155-183              | 3249.694 | (R)DSLQAFLDLANANLPAPFFTLPLQKDSFR(N)       | *    | √                         | √                         |
| 18 | 190-204              | 1475.749 | (R)SSDLVALSGGHTFGK(N)                     | √    | √                         | √                         |
| 19 | 190-208              | 2034.966 | (R)SSDLVALSGGHTFGKNQCR(F)                 | √    | √                         | √                         |
| 20 | 237-254              | 1974.995 | (R)GLCPLNGNLSALVDFDLR(T)                  | √    | *                         | *                         |
| 21 | 246-254              | 1035.547 | (R)SALVDFDLR(T)                           | √    | *                         | *                         |
| 22 | 255-262              | 935.483  | (R)TPTIFDNK(Y)                            | √    | √                         | *                         |
| 23 | 255-271              | 2102.044 | (R)TPTIFDNKYYVNLEEQK(G)                   | *    | √                         | *                         |
| 24 | 263-271              | 1185.579 | (K)YYVNLEEQK(G)                           | √    | *                         | *                         |
| 25 | 314-328              | 1586.832 | (R)MGNITPLTGTQGQIR(L)                     | √    | √                         | √                         |

[a] 1 min of shake-assisted digestion at 37 °C

[b] nanoflowers were stored at -20 °C for 20 days

**Table S5.** Identification of proteins from human serum digested by the nanoflower-based microreactor (n=2)

| Group (#) | Distinct Peptides(#) | Distinct Summed MS/MS Search Score | % Coverage | AA | Protein Name                                                                                                                                                                                                           |
|-----------|----------------------|------------------------------------|------------|----|------------------------------------------------------------------------------------------------------------------------------------------------------------------------------------------------------------------------|
| 1         | 79                   | 1442.25                            | 92         |    | Serum albumin precursor                                                                                                                                                                                                |
| 2         | 19                   | 311                                | 59         |    | Apolipoprotein A-I precursor                                                                                                                                                                                           |
| 3         | 18                   | 300.96                             | 30         |    | Serotransferrin precursor                                                                                                                                                                                              |
| 4         | 20                   | 299.79                             | 18         |    | Alpha-2-macroglobulin precursor                                                                                                                                                                                        |
| 4         | 1                    | 17.79                              | 0          |    | Pregnancy zone protein precursor                                                                                                                                                                                       |
| 5         | 17                   | 294.63                             | 43         |    | Haptoglobin precursor [Contains: Haptoglobin alpha chain; Haptoglobin beta chain]                                                                                                                                      |
| 5         | 8                    | 139.28                             | 22         |    | Haptoglobin-related protein precursor                                                                                                                                                                                  |
| 6         | 18                   | 277.18                             | 39         |    | Alpha-1-antitrypsin precursor                                                                                                                                                                                          |
| 7         | 10                   | 189.16                             | 96         |    | Ig kappa chain C region                                                                                                                                                                                                |
| 8         | 12                   | 188.42                             | 9          |    | Complement C3 precursor [Contains: Complement C3 beta chain; Complement C3 alpha chain; C3a anaphylatoxin; Complement C3b alpha' chain; Complement C3c alpha' chain fragment 1; Complement C3dg fragment; Complemen... |
| 9         | 10                   | 179.48                             | 36         |    | Ig alpha-1 chain C region                                                                                                                                                                                              |
| 9         | 6                    | 101.55                             | 20         |    | Ig alpha-2 chain C region                                                                                                                                                                                              |
| 10        | 11                   | 175.56                             | 40         |    | Ig gamma-1 chain C region                                                                                                                                                                                              |
| 10        | 9                    | 140.68                             | 31         |    | Ig gamma-2 chain C region                                                                                                                                                                                              |
| 10        | 6                    | 83.94                              | 15         |    | Ig gamma-3 chain C region                                                                                                                                                                                              |
| 10        | 6                    | 81.56                              | 20         |    | Ig gamma-4 chain C region                                                                                                                                                                                              |
| 11        | 6                    | 107.27                             | 80         |    | Ig lambda chain C regions                                                                                                                                                                                              |
| 12        | 5                    | 75.43                              | 27         |    | Alpha-1-acid glycoprotein 1 precursor                                                                                                                                                                                  |
| 12        | 2                    | 28.98                              | 8          |    | Alpha-1-acid glycoprotein 2 precursor                                                                                                                                                                                  |
| 13        | 5                    | 72.16                              | 44         |    | Apolipoprotein A-II precursor                                                                                                                                                                                          |

|    |   |       |    |                                                         |
|----|---|-------|----|---------------------------------------------------------|
| 14 | 5 | 67.77 | 12 | Hemopexin precursor                                     |
| 15 | 3 | 47.1  | 7  | Alpha-1-antichymotrypsin precursor                      |
| 16 | 3 | 41.9  | 27 | Ig kappa chain V-III region WOL                         |
| 16 | 2 | 28.7  | 21 | Ig kappa chain V-III region GOL                         |
| 16 | 2 | 28.7  | 21 | Ig kappa chain V-III region Ti                          |
| 16 | 2 | 28.7  | 21 | Ig kappa chain V-III region SIE                         |
| 17 | 3 | 41.03 | 8  | Alpha-1B-glycoprotein precursor                         |
| 18 | 3 | 38.17 | 5  | Complement factor B precursor                           |
| 19 | 2 | 33.73 | 27 | Serum amyloid A protein precursor                       |
| 20 | 2 | 30.67 | 2  | Complement C4-B precursor                               |
| 20 | 2 | 30.67 | 2  | Complement C4-A precursor                               |
| 21 | 2 | 27.48 | 11 | Ig kappa chain V-III region CLL precursor               |
| 21 | 2 | 27.48 | 13 | Ig kappa chain V-III region POM                         |
| 21 | 2 | 27.48 | 15 | Ig kappa chain V-III region NG9 precursor               |
| 21 | 1 | 15.83 | 7  | Ig kappa chain V-III region VH precursor                |
| 21 | 1 | 15.83 | 8  | Ig kappa chain V-I region Lay                           |
| 22 | 2 | 25.39 | 8  | Beta-2-glycoprotein 1 precursor                         |
| 23 | 1 | 21.32 | 14 | Ig kappa chain V-IV region Len                          |
| 24 | 1 | 21.31 | 15 | Ig heavy chain V-III region BRO                         |
| 24 | 1 | 21.31 | 15 | Ig heavy chain V-III region TEI                         |
| 25 | 2 | 21.02 | 13 | Ig kappa chain V-III region VG precursor                |
| 26 | 1 | 20.93 | 15 | Ig heavy chain V-III region WAS                         |
| 26 | 1 | 20.93 | 15 | Ig heavy chain V-III region POM                         |
| 26 | 1 | 20.93 | 15 | Ig heavy chain V-III region TUR                         |
| 26 | 1 | 20.93 | 15 | Ig heavy chain V-III region TIL                         |
| 27 | 1 | 20.21 | 3  | AMBP protein precursor [Contains: Alpha-1-microglobulin |

---

**Table S6.** Identification of proteins from human serum digested by the nanoflower-based microreactor (stored at -20 °C for 20 days ) (n=2)

| Group (#) | Distinct Peptides (#) | Distinct Summed MS/MS Search Score | % Coverage | AA | Protein Name                                                                                                                                                                                                           |
|-----------|-----------------------|------------------------------------|------------|----|------------------------------------------------------------------------------------------------------------------------------------------------------------------------------------------------------------------------|
| 1         | 79                    | 1430.76                            | 91         |    | Serum albumin precursor                                                                                                                                                                                                |
| 2         | 18                    | 310.22                             | 40         |    | Haptoglobin precursor [Contains: Haptoglobin alpha chain; Haptoglobin beta chain]                                                                                                                                      |
| 2         | 7                     | 123.19                             | 20         |    | Haptoglobin-related protein precursor                                                                                                                                                                                  |
| 3         | 15                    | 247.24                             | 21         |    | Serotransferrin precursor                                                                                                                                                                                              |
| 4         | 15                    | 223.85                             | 43         |    | Apolipoprotein A-I precursor                                                                                                                                                                                           |
| 5         | 11                    | 200.88                             | 41         |    | Ig alpha-1 chain C region                                                                                                                                                                                              |
| 5         | 7                     | 123.28                             | 25         |    | Ig alpha-2 chain C region                                                                                                                                                                                              |
| 6         | 11                    | 186.75                             | 94         |    | Ig kappa chain C region                                                                                                                                                                                                |
| 7         | 12                    | 176.56                             | 32         |    | Alpha-1-antitrypsin precursor                                                                                                                                                                                          |
| 8         | 11                    | 168.9                              | 9          |    | Alpha-2-macroglobulin precursor                                                                                                                                                                                        |
| 9         | 10                    | 167.48                             | 37         |    | Ig gamma-1 chain C region                                                                                                                                                                                              |
| 9         | 9                     | 146.98                             | 30         |    | Ig gamma-2 chain C region                                                                                                                                                                                              |
| 9         | 6                     | 83.14                              | 15         |    | Ig gamma-3 chain C region                                                                                                                                                                                              |
| 9         | 5                     | 78.88                              | 15         |    | Ig gamma-4 chain C region                                                                                                                                                                                              |
| 10        | 7                     | 125.66                             | 86         |    | Ig lambda chain C regions                                                                                                                                                                                              |
| 11        | 7                     | 111.05                             | 4          |    | Complement C3 precursor [Contains: Complement C3 beta chain; Complement C3 alpha chain; C3a anaphylatoxin; Complement C3b alpha' chain; Complement C3c alpha' chain fragment 1; Complement C3dg fragment; Complemen... |
| 12        | 3                     | 52.65                              | 9          |    | Hemopexin precursor                                                                                                                                                                                                    |
| 13        | 4                     | 51                                 | 44         |    | Apolipoprotein A-II precursor                                                                                                                                                                                          |
| 14        | 2                     | 42.08                              | 11         |    | Alpha-1-acid glycoprotein 1 precursor                                                                                                                                                                                  |

|    |   |       |    |                                           |
|----|---|-------|----|-------------------------------------------|
| 14 | 1 | 16.09 | 4  | Alpha-1-acid glycoprotein 2 precursor     |
| 15 | 2 | 34.77 | 27 | Serum amyloid A protein precursor         |
| 16 | 2 | 31.67 | 1  | Complement C4-B precursor                 |
| 16 | 2 | 31.67 | 1  | Complement C4-A precursor                 |
| 17 | 2 | 30.89 | 21 | Ig kappa chain V-III region GOL           |
| 17 | 2 | 30.89 | 21 | Ig kappa chain V-III region Ti            |
| 17 | 2 | 30.89 | 21 | Ig kappa chain V-III region SIE           |
| 17 | 2 | 30.89 | 21 | Ig kappa chain V-III region WOL           |
| 18 | 2 | 29.39 | 3  | Complement factor B precursor             |
| 19 | 2 | 26.61 | 7  | Alpha-2-HS-glycoprotein precursor         |
| 20 | 2 | 24.9  | 4  | Alpha-1-antichymotrypsin precursor        |
| 21 | 2 | 23.96 | 3  | Alpha-1B-glycoprotein precursor           |
| 22 | 2 | 23.15 | 13 | Ig kappa chain V-III region VG precursor  |
| 23 | 2 | 21.9  | 11 | Ig kappa chain V-III region CLL precursor |
| 23 | 2 | 21.9  | 13 | Ig kappa chain V-III region POM           |
| 23 | 2 | 21.9  | 15 | Ig kappa chain V-III region NG9 precursor |
| 23 | 1 | 11.23 | 7  | Ig kappa chain V-III region VH precursor  |
| 23 | 1 | 11.23 | 8  | Ig kappa chain V-I region Lay             |
| 24 | 1 | 21.53 | 15 | Ig heavy chain V-III region BRO           |
| 24 | 1 | 21.53 | 15 | Ig heavy chain V-III region TEI           |
| 25 | 1 | 20.5  | 15 | Ig heavy chain V-III region WAS           |
| 25 | 1 | 20.5  | 15 | Ig heavy chain V-III region POM           |
| 25 | 1 | 20.5  | 15 | Ig heavy chain V-III region TUR           |
| 25 | 1 | 20.5  | 15 | Ig heavy chain V-III region TIL           |
| 26 | 1 | 20.24 | 14 | Ig kappa chain V-IV region Len            |

---

**Table S7.** Identification of proteins from human serum digested by the free trypsin (n=2)

| Group (#) | Distinct Peptides (#) | Distinct Summed MS/MS Search Score | % Coverage | AA | Protein Name                                                                         |
|-----------|-----------------------|------------------------------------|------------|----|--------------------------------------------------------------------------------------|
| 1         | 61                    | 1132.43                            | 84         |    | Serum albumin precursor                                                              |
| 2         | 17                    | 280                                | 40         |    | Alpha-1-antitrypsin precursor                                                        |
| 3         | 14                    | 257.81                             | 29         |    | Serotransferrin precursor                                                            |
| 4         | 16                    | 256.33                             | 13         |    | Alpha-2-macroglobulin precursor                                                      |
| 4         | 2                     | 29.64                              | 1          |    | Pregnancy zone protein precursor                                                     |
| 5         | 14                    | 251.89                             | 58         |    | Ig gamma-1 chain C region                                                            |
| 5         | 11                    | 178.61                             | 48         |    | Ig gamma-2 chain C region                                                            |
| 5         | 7                     | 110.8                              | 20         |    | Ig gamma-4 chain C region                                                            |
| 5         | 7                     | 102.61                             | 29         |    | Ig gamma-3 chain C region                                                            |
| 6         | 14                    | 244.37                             | 58         |    | Apolipoprotein A-I precursor                                                         |
| 7         | 13                    | 225.88                             | 43         |    | Haptoglobin precursor<br>[Contains: Haptoglobin alpha chain; Haptoglobin beta chain] |
| 7         | 6                     | 106.59                             | 20         |    | Haptoglobin-related protein precursor                                                |
| 8         | 14                    | 218.74                             | 10         |    | Complement C3 precursor<br>[Contains: Complement C3 beta chain; Complement C3 alpha  |



|    |    |        |    |                                                                                                                                                      |
|----|----|--------|----|------------------------------------------------------------------------------------------------------------------------------------------------------|
|    |    |        |    | chain; C3a anaphylatoxin;<br>Complement C3b alpha'<br>chain; Complement C3c<br>alpha' chain fragment 1;<br>Complement C3dg<br>fragment; Complemen... |
| 9  | 11 | 182.6  | 41 | Ig alpha-1 chain C region                                                                                                                            |
| 9  | 8  | 131.9  | 32 | Ig alpha-2 chain C region                                                                                                                            |
| 10 | 8  | 161.37 | 87 | Ig kappa chain C region                                                                                                                              |
| 11 | 5  | 96.1   | 75 | Ig lambda chain C regions                                                                                                                            |
| 12 | 5  | 73.66  | 14 | Alpha-1-antichymotrypsin<br>precursor                                                                                                                |
| 13 | 4  | 71.72  | 16 | Hemopexin precursor                                                                                                                                  |
| 14 | 4  | 66.79  | 23 | Alpha-1-acid glycoprotein<br>1 precursor                                                                                                             |
| 14 | 1  | 14.7   | 4  | Alpha-1-acid glycoprotein<br>2 precursor                                                                                                             |
| 15 | 4  | 49.1   | 68 | Apolipoprotein A-II<br>precursor                                                                                                                     |
| 16 | 2  | 33.47  | 2  | Complement C4-B<br>precursor                                                                                                                         |
| 16 | 2  | 33.47  | 2  | Complement C4-A<br>precursor                                                                                                                         |
| 17 | 2  | 32.52  | 19 | Ig heavy chain V-III<br>region BRO                                                                                                                   |
| 17 | 2  | 32.52  | 19 | Ig heavy chain V-III<br>region TEI                                                                                                                   |
| 18 | 3  | 29.49  | 22 | Ig kappa chain V-III<br>region NG9 precursor                                                                                                         |
| 18 | 2  | 21.94  | 11 | Ig kappa chain V-III<br>region CLL precursor                                                                                                         |
| 18 | 2  | 21.94  | 13 | Ig kappa chain V-III<br>region POM                                                                                                                   |
| 18 | 1  | 13.51  | 7  | Ig kappa chain V-III<br>region VH precursor                                                                                                          |
| 18 | 1  | 13.51  | 8  | Ig kappa chain V-I region<br>Lay                                                                                                                     |
| 19 | 2  | 26.29  | 15 | Ig heavy chain V-III<br>region KOL                                                                                                                   |
| 20 | 2  | 25.8   | 19 | Ig heavy chain V-III<br>region WAS                                                                                                                   |
| 20 | 2  | 25.8   | 19 | Ig heavy chain V-III<br>region POM                                                                                                                   |
| 20 | 2  | 25.8   | 19 | Ig heavy chain V-III                                                                                                                                 |

|    |   |       |    |                                                  |
|----|---|-------|----|--------------------------------------------------|
| 20 | 2 | 25.8  | 20 | region TUR<br>Ig heavy chain V-III<br>region TIL |
| 21 | 2 | 21.04 | 7  | Alpha-1B-glycoprotein<br>precursor               |

---
